# 1 Analysis of Inositol Phosphate Metabolism by Capillary Electrophoresis Electrospray 2 Ionization Mass Spectrometry (CE-ESI-MS)

3

4 Danye Qiu<sup>a,\*</sup>, Miranda S. Wilson<sup>b</sup>, Verena B. Eisenbeis<sup>a</sup>, Robert K. Harmel<sup>c</sup>, Esther Riemer<sup>d</sup>, Thomas  
5 M. Haas<sup>a</sup>, Christopher Wittwer<sup>a</sup>, Nikolaus Jork<sup>a</sup>, Chunfang Gu<sup>e</sup>, Stephen B. Shears<sup>e</sup>, Gabriel Schaaf<sup>d</sup>,  
6 Bernd Kammerer<sup>a</sup>, Dorothea Fiedler<sup>c</sup>, Adolfo Saiardi<sup>b,\*</sup>, Henning J. Jessen<sup>a,f,\*</sup>

7

8 a) Institute of Organic Chemistry, University of Freiburg, Albertstr. 21, 79104 Freiburg, Germany

9 b) Medical Research Council, Laboratory for Molecular Cell Biology, University College London, London, WC1E  
10 6BT, UK.

11 c) Leibniz-Forschungsinstitut für Molekulare Pharmakologie, Robert-Rössle-Str. 10, 13125 Berlin, Germany.

12 d) Institute of Crop Science and Resource Conservation, Department of Plant Nutrition, Rheinische Friedrich-  
13 Wilhelms-University Bonn, 53115 Bonn, Germany.

14 e) Signal Transduction Laboratory, National Institute of Environmental Health Sciences, National Institutes of  
15 Health, Research Triangle Park, NC 27709 USA

16 f) CIBSS - Centre for Integrative Biological Signalling Studies, University of Freiburg, 79104 Freiburg, Germany.

17

18 \* danyequiu@gmail.com; a.saiardi@ucl.ac.uk; henning.jessen@oc.uni-freiburg.de

19

## 20 Abstract

21 The analysis of *myo*-inositol phosphates (InsPs) and *myo*-inositol pyrophosphates (PP-InsPs)  
22 is a daunting challenge due to the large number of possible isomers, the absence of a  
23 chromophore, the high charge density, the low abundance, and the instability of the esters  
24 and anhydrides. Given their importance in biology, an analytical approach to follow and  
25 understand this complex signaling hub is highly desirable. Here, capillary electrophoresis (CE)  
26 coupled to electrospray ionization mass spectrometry (ESI-MS) is implemented to analyze  
27 complex mixtures of InsPs and PP-InsPs with high sensitivity. Stable isotope labeled (SIL)  
28 internal standards allow for matrix-independent quantitative assignment. The method is  
29 validated in wild-type and knockout mammalian cell lines and in model organisms. SIL-CE-  
30 ESI-MS enables for the first time the accurate monitoring of InsPs and PP-InsPs arising from  
31 compartmentalized cellular synthesis pathways, by feeding cells with either [<sup>13</sup>C<sub>6</sub>]-*myo*-inositol  
32 or [<sup>13</sup>C<sub>6</sub>]-D-glucose. In doing so, we uncover that there must be unknown inositol synthesis  
33 pathways in mammals, highlighting the unique potential of this method to dissect inositol  
34 phosphate metabolism and signalling.

35

## 36 Introduction

37 *myo*-Inositol (inositol hereafter) phosphates (InsPs) are second messengers involved in  
38 signaling processes in eukaryotes<sup>1</sup>. In principle, 63 phosphorylated InsPs can be generated  
39 by sequential phosphorylation of the hydroxy groups of inositol, resulting in significant

1 analytical ramifications. Moreover, the fully phosphorylated inositol hexakisphosphate  $\text{InsP}_6$ ,  
2 the usually most abundant species, can be further phosphorylated to diphospho-inositol  
3 polyphosphates (PP- $\text{InsPs}$ ), called inositol pyrophosphates (Figure 1a and Supplementary  
4 Figure 1 for the mammalian PP- $\text{InsPs}$  pathway)<sup>2,3</sup>. These structures contain one (PP- $\text{InsP}_5$ )  
5 or two ((PP)<sub>2</sub>- $\text{InsP}_4$ ) phosphoric anhydride (P-anhydride) bonds in addition to the phosphate  
6 esters (Figure 1a). The current model for biologically relevant isomers places the P-anhydrides  
7 in defined positions. For example, mammals, yeast, and plants produce 5-PP- $\text{InsP}_5$  as the  
8 main isomer, with the P-anhydride residing in the plane of symmetry at the 5-position. The  
9 second, lower abundance, isomer is 1-PP- $\text{InsP}_5$ , which has a biologically likely irrelevant  
10 enantiomer, its mirror-image 3-PP- $\text{InsP}_5$ . Further phosphorylation of 5-PP- $\text{InsP}_5$  leads to 1,5-  
11 (PP)<sub>2</sub>- $\text{InsP}_4$ . PP- $\text{InsPs}$  are considered metabolic messengers, whose functions have recently  
12 become the focus of intense research<sup>4</sup>. Across species, they are signals in diverse processes  
13 including the regulation of energy metabolism and phosphate homeostasis<sup>5-7</sup>. Other  
14 organisms, e.g. the social amoeba *Dictyostelium discoideum*, produce distinct PP- $\text{InsPs}$   
15 isomers (Figure 1a) whose functions remain elusive<sup>8,9</sup>.

16 The metabolic complexity of  $\text{InsP}$  turnover and their low abundance, in combination with the  
17 absence of a chromophore, and high charge density, has hampered research into these  
18 signaling molecules. The most widely applied quantification technology relies on metabolic  
19 labeling of cells using tritiated [<sup>3</sup>H]-inositol, followed by acidic extraction, strong anion  
20 exchange high performance liquid chromatography (SAX-HPLC), and manual scintillation  
21 counting of individual fractions<sup>10</sup>. While this approach is sensitive, it requires a dedicated  
22 radioactive suite, is expensive, and labor and time-consuming. Moreover, it is blind to inositol  
23 generated endogenously from D-glucose-6-phosphate by inositol-3-phosphate synthase 1  
24 (ISYNA1). Therefore, postcolumn derivatization UV-detection approaches have been  
25 developed to avoid radiolabeling<sup>11,12</sup>. Recently, it was shown that inositol tetrakisphosphate 1-  
26 kinase 1 (ITPK1), which is present in Asgard archaea, social amoeba, plants, and animals,  
27 sequentially phosphorylates  $\text{Ins}(3)\text{P}$  ultimately leading to  $\text{InsP}_6$  and PP- $\text{InsPs}$ <sup>11,13,14</sup>. Different  
28  $\text{InsP}$  pools generated from exogenously-acquired or endogenously-synthesized inositol can  
29 potentially be monitored using chromatography coupled to mass spectrometry (LC-MS) after  
30 feeding cells with 'heavier' species such as [<sup>13</sup>C<sub>6</sub>]-inositol. However, standard SAX-HPLC  
31 using water-salt-based gradients is incompatible with MS detection and MS-compatible  
32 volatile buffers do not currently enable isomer assignment<sup>15</sup>. HPLC-MS/MS and hydrophilic  
33 interaction liquid chromatography coupled to MS (HILIC-MS/MS) unfortunately result in a  
34 suboptimal separation of the analytes, obliterating  $\text{InsP}$  isomer identity<sup>16</sup>.

35 The development of resolving methods using an electric field to separate the differentially  
36 charged  $\text{InsPs}$  has been pursued. High-voltage paper chromatography<sup>17</sup> was instrumental in  
37 the discovery and establishment of  $\text{Ins}(1,4,5)\text{P}_3$  as the  $\text{Ca}^{2+}$  release factor<sup>18</sup>. The separation

1 of higher InsPs by gel electrophoresis (PAGE) is another possibility; it, however, does not  
2 have the resolving power to distinguish PP-InsP regioisomers and does not detect lower InsPs  
3 due to staining inefficiency<sup>19</sup>.

4 A capillary electrophoresis (CE) mass spectrometry (MS) method is described herein, that  
5 complements and significantly improves analytical approaches in the field. It does not require  
6 derivatization, benefits from the separation efficiency of charged analytes by CE, and enables  
7 accurate isomer identification and quantification using stable isotope labeled (SIL) reference  
8 compounds, even in complex matrices. This new setup also enables stable isotope pulse  
9 labeling experiments to analyze the amount of endogenously synthesized inositol over time.

10

## 11 **Results**

### 12 **Development of CE-ESI-MS for the analysis of InsPs and PP-InsPs**

13 CE is known as an effective separation tool for phosphate-containing molecules. An early  
14 attempt to implement CE was made in the study of Ins(1,4,5)P<sub>3</sub>, but the method was not  
15 developed further<sup>20</sup>. We now introduce a CE-ESI-MS method, using a bare fused silica  
16 capillary and a simple background electrolyte (BGE), for parallel analyses of PP-InsPs and  
17 InsPs.

18 A set of PP-InsP and InsP standards (Figure 1b), representing mammalian metabolites (Figure  
19 1a, Supplementary Figure 1), including Ins(1,4,5)P<sub>3</sub>, Ins(1,3,4,6)P<sub>4</sub>, Ins(1,4,5,6)P<sub>4</sub>,  
20 Ins(1,3,4,5)P<sub>4</sub>, Ins(2,3,4,5,6)P<sub>5</sub>, Ins(1,3,4,5,6)P<sub>5</sub>, Ins(1,2,3,4,6)P<sub>5</sub>, Ins(1,2,3,4,5)P<sub>5</sub>, InsP<sub>6</sub>, 5-  
21 PP-InsP<sub>5</sub>, 1-PP-InsP<sub>5</sub>, and 1,5-(PP)<sub>2</sub>-InsP<sub>4</sub>, was resolved with a BGE (35 mM ammonium  
22 acetate adjusted to pH 9.7 with NH<sub>4</sub>OH) by applying a 30 kV voltage over a regular bare fused  
23 silica capillary with a length of 100 cm. Detection of analytes was achieved with an ESI-TOF-  
24 MS instrument in the negative ionization mode. A stable CE separation current (23 μA) and  
25 ESI spray current (2.1 μA) were maintained with a sheath flow CE-ESI-MS interface. The limits  
26 of quantification (LOQs) for different InsPs were 250 nM, with 10 nL sample injection volume,  
27 i.e. 2.5 fmol of analyte. As baseline separation for the analytes is achieved, no issues with the  
28 inevitable in-source fragmentation with neutral loss of phosphate are encountered for accurate  
29 quantification. Generally, less than 10% in-source fragmentation products were produced from  
30 doubly charged anionic forms of InsP<sub>5</sub> to InsP<sub>8</sub> with neutral loss of phosphate (79.97 Da).

31 Next, we validated the CE-ESI-MS protocol in analyzing InsPs from biological samples.  
32 Initially, we focused on two HCT116 cell lines (HCT116<sup>UCL</sup> and HCT116<sup>NIH</sup>) that have been  
33 shown to possess different PP-InsP levels<sup>21</sup>. The CE-ESI-MS method was fully compatible  
34 with current state-of-the-art InsP extraction by perchloric acid followed by enrichment with TiO<sub>2</sub>  
35 (Figure 1c). We introduced and resolved in parallel stable-isotope labelled (SIL) internal  
36 standards of [<sup>13</sup>C<sub>6</sub>]1,5-(PP)<sub>2</sub>-InsP<sub>4</sub>, [<sup>13</sup>C<sub>6</sub>]5-PP-InsP<sub>5</sub>, [<sup>13</sup>C<sub>6</sub>]1-PP-InsP<sub>5</sub>, [<sup>13</sup>C<sub>6</sub>]InsP<sub>6</sub> and  
37 [<sup>13</sup>C<sub>6</sub>]Ins(1,3,4,5,6)P<sub>5</sub><sup>22</sup>. Application of SIL standards is crucial, as the assignment of InsPs,

1 particularly regioisomers, now becomes unambiguous. Spiking with precise amounts of SIL  
2 standards into a biological extract also enables a reliable quantitative assessment, since they  
3 compensate for matrix effects and analyte loss. Ins(1,3,4,5,6)P<sub>5</sub>, InsP<sub>6</sub>, and 5-PP-InsP<sub>5</sub> were  
4 assigned by their isotopic pattern, accurate mass, and identical migration time with spiked SIL  
5 standards. Excellent resolution and column efficiency were obtained: 1.5×10<sup>4</sup>, 4.6×10<sup>4</sup>,  
6 3.0×10<sup>4</sup> theoretical plates per meter for 5-PP-InsP<sub>5</sub>, InsP<sub>6</sub> and Ins(1,3,4,5,6)P<sub>5</sub>, isolated from  
7 HCT116<sup>NIH</sup> extract, respectively (Figure 1c). Analysis of HCT116<sup>UCL</sup> extract found 1,5-(PP)<sub>2</sub>-  
8 InsP<sub>4</sub> (Figure 2aI), a signal which was generally under the LOQ (250 nM) but within LOD in  
9 HCT116<sup>NIH</sup> extract (Figure 2aII), consistent with previous observations<sup>21</sup>. Furthermore, the  
10 analysis of HCT116<sup>UCL</sup> confirmed the presence of the less abundant 1-PP-InsP<sub>5</sub> isomer,  
11 representing less than 10% of the cellular PP-InsP pool (Figure 2aIII). This is an important  
12 step forward for characterizing PP-InsP metabolism using mass spectrometry. The TiO<sub>2</sub>  
13 extraction method was previously reported to fully recover PP-InsPs and InsP<sub>6</sub> from  
14 mammalian cell extracts<sup>23</sup>. We confirmed this observation by spiking the HCT116<sup>NIH</sup> samples  
15 with SIL internal standards both before extraction (pre-spiking) and before measurement  
16 (post-spiking) (Supplementary Figure 2).

17 The CE-ESI-MS protocols are not limited to analysis of InsP<sub>6</sub> and PP-InsPs. Using the  
18 described conditions, Ins(1/3,2,4,5,6)P<sub>5</sub> and Ins(1,2,3,4,6)P<sub>5</sub> or Ins(1,2,3,4/6,5)P<sub>5</sub> were readily  
19 distinguished from Ins(1,3,4,5,6)P<sub>5</sub> (Supplementary Figure 3a). Similarly, identification of  
20 InsP<sub>4</sub> positional isomers was achieved by measuring the accurate mass in combination with  
21 spiking of InsP<sub>4</sub> standards Ins(1,3,4,6)P<sub>4</sub>, Ins(1,4,5,6)P<sub>4</sub> and Ins(1,3,4,5)P<sub>4</sub> (Figure 2b).

22 Owing to minimal sample consumption (10 nL) and rapid analysis time (30 min) per run,  
23 measurement of technical replicates is feasible. The intra- and inter-day repeatabilities of the  
24 method analyzing HCT116<sup>NIH</sup> extract were evaluated, with mean RSDs of 3.0% (Day 1), 3.1%  
25 (Day 2) and 6.3% (Day 3) for three technical replicates, and a mean RSD of 3.6% for technical  
26 replicates from five individual days (Figure 1d). A comparison with the repeatability of SAX-  
27 HPLC studies is difficult: details of technical replicates are often not provided, since the  
28 analysis of one sample takes about 6-8 hours with hands-on processing<sup>24,25</sup>.

29

### 30 **CE-ESI-MS analysis of mammalian PP-InsP metabolism**

31 The CE-ESI-MS method was also applied to monitor changes in PP-InsPs metabolism in  
32 mammalian cells in which their synthetic enzymes have been knocked out or perturbed using  
33 inhibitors. In mammals, PP-InsPs are synthesized by two different classes of enzymes  
34 (Supplementary Figure 1). The IP6Ks, by phosphorylating position 5 of InsP<sub>6</sub>, synthesize 5-  
35 PP-InsP<sub>5</sub>. The PPIP5Ks are bifunctional (kinase/phosphatase) enzymes that, by acting on  
36 position 1, mainly convert 5-PP-InsP<sub>5</sub> into 1,5-(PP)<sub>2</sub>-InsP<sub>4</sub>. CE-ESI-MS analysis of

1 HCT116<sup>UCL</sup>*IP6K1,2*<sup>-/-</sup> confirms prior observations that PP-InsPs are absent (Figure 2aV)<sup>26</sup>.  
2 Levels of PP-InsPs can be increased by blocking their dephosphorylation using sodium  
3 fluoride (NaF, 10 mM)<sup>27</sup>. CE-ESI-MS analysis of NaF-treated HCT116<sup>UCL</sup> (Supplementary  
4 Figure 3) or HCT116<sup>NIH</sup> cells (Figure 2c) demonstrated the expected 5-PP-InsP<sub>5</sub> elevation  
5 (7.3-fold in HCT116<sup>UCL</sup> cells and 6.2-fold in HCT116<sup>NIH</sup> cells) with concomitant reduction in  
6 InsP<sub>6</sub>. We observed a reduction in Ins(1,3,4,5,6)P<sub>5</sub> levels and appearance of 5-PP-InsP<sub>4</sub>  
7 (Figure 2aIV), changes also observable by SAX-HPLC analysis of [<sup>3</sup>H]-inositol labeled  
8 HCT116<sup>UCL</sup> (Supplementary Figure 3). The synthesis of 5-PP-InsP<sub>4</sub> is dependent on IP6Ks  
9 acting on Ins(1,3,4,5,6)P<sub>5</sub>: consistent with this, CE-ESI-MS analysis of NaF-treated  
10 HCT116<sup>UCL</sup>*IP6K1,2*<sup>-/-</sup> also failed to detect any 5-PP-InsP<sub>4</sub>. However, confirming a previous  
11 observation<sup>26</sup>, 1-PP-InsP<sub>5</sub> became detectable in HCT116<sup>UCL</sup>*IP6K1,2*<sup>-/-</sup> after NaF treatment  
12 (Figure 2aVI). This is explained by PPIP5Ks' capacity to use InsP<sub>6</sub> as a substrate, particularly  
13 when its preferred substrate, 5-PP-InsP<sub>5</sub>, is absent. We also observed an increase in  
14 Ins(1/3,4,5,6)P<sub>4</sub> levels in NaF-treated HCT116<sup>NIH</sup> cells (Figure 2b) as a result of PLC  
15 activation<sup>27</sup>. Analysis of HCT116<sup>NIH</sup>*PPIP5K1,2*<sup>-/-</sup> in comparison to WT cells showed a small  
16 increase of the non-metabolized substrate 5-PP-InsP<sub>5</sub>, the levels of which are 3.6-fold  
17 enhanced by NaF treatment (Figure 2c). We additionally analyzed the effect of a recently  
18 identified IP6K inhibitor: quercetin (Q)<sup>28</sup> reduced 5-PP-InsP<sub>5</sub> levels in both HCT116<sup>NIH</sup> and  
19 HCT116<sup>NIH</sup>*PPIP5K1,2*<sup>-/-</sup> cells by 50-60% (Figure 2c).  
20 These results validate CE-ESI-MS as a technique to monitor with unprecedented accuracy  
21 changes in cellular InsPs and PP-InsPs metabolism in response to different stressors or  
22 genetic alterations.

23

#### 24 **Analysis of InsPs in mammalian cell lines and tissues**

25 We determined the concentrations of Ins(1,3,4,5,6)P<sub>5</sub>, InsP<sub>6</sub>, and 5-PP-InsP<sub>5</sub>, in different  
26 mammalian cell lines, including HCT116<sup>UCL</sup>, HeLa, HT29, PC3, 293T, and MCF7 (Figure 2d,  
27 Supplementary Figure 4). The detected InsP<sub>6</sub> and 5-PP-InsP<sub>5</sub> cellular concentrations as well  
28 as their relative ratio are in accordance with earlier results obtained by [<sup>13</sup>C]-NMR<sup>29</sup>. The InsP<sub>6</sub>  
29 cellular concentration, for example, was in the range of 24-47 μM (300-500 pmol/mg protein).  
30 However, Ins(1,3,4,5,6)P<sub>5</sub> levels were surprisingly variable, potentially reflecting different  
31 functional roles (Supplementary Figure 5) across different cell lines. Therefore, the CE-MS  
32 method will be instrumental to uncover dynamics and physiological roles of InsP<sub>5</sub> in  
33 mammalian cells.

34 We quantified the amount of InsPs and PP-InsPs in mouse organs, including liver, brain,  
35 muscle, kidney, and spleen (Supplementary Figure 6). Again, Ins(1,3,4,5,6)P<sub>5</sub>, InsP<sub>6</sub>, and 5-  
36 PP-InsP<sub>5</sub> were the main InsP species. Comparably low InsP levels were detected in muscle.  
37 Analysis of InsP<sub>6</sub> and 5-PP-InsP<sub>5</sub> extracted from tissues performed by PAGE, lack the

1 sensitivity, resolution and dynamic range, evidenced by CE-ESI-MS. The analysis of InsPs  
2 from animal organs or tissues cannot be performed by SAX-HPLC, prohibited by cost,  
3 feasibility, and ethical considerations, since it requires feeding a mouse with [<sup>3</sup>H]-inositol.

#### 4 5 **InsPs and PP-InsPs in *Saccharomyces cerevisiae* and *Arabidopsis thaliana***

6 We next analyzed InsPs and PP-InsPs in yeast and plant samples, to explore the applicability  
7 of CE-ESI-MS across experimental models. The [<sup>3</sup>H]-inositol SAX-HPLC method has been  
8 extensively employed to study yeast and plant InsP metabolism. PAGE methods conversely  
9 cannot be used to analyze InsPs from yeast, due to the abundant inorganic polyphosphate  
10 (polyP) that suppresses the InsP signals (Supplementary Figure 7a), and while PAGE has  
11 been applied to study InsPs including PP-InsPs in plant extracts<sup>14,30,31</sup>, the same limitations  
12 described above apply. Using SIL-CE-ESI-MS, profiling of InsPs and PP-InsPs was readily  
13 achieved for both *Saccharomyces cerevisiae* and *Arabidopsis thaliana*.

14 In wild type yeast extracts, InsP<sub>6</sub>, 5-PP-InsP<sub>5</sub> and 1/3,5-(PP)<sub>2</sub>-InsP<sub>4</sub> were detectable. In  
15 agreement with the literature<sup>32</sup>, 5-PP-InsP<sub>5</sub> and 1/3,5-(PP)<sub>2</sub>-InsP<sub>4</sub> were around 3% and 1% of  
16 the InsP<sub>6</sub> level, respectively (Supplementary Figure 7).

17 We analyzed the InsPs present in shoots of *A. thaliana* wild type (Col-0) and in plants defective  
18 in Inositol Pentakisphosphate 2-Kinase (AtIPK1) or the ATP-binding cassette (ABC)  
19 transporter 5 (AtMRP5)<sup>33</sup> that transports InsP<sub>6</sub> into the vacuole (Figure 3): Ins(1/3,2,4,5,6)P<sub>5</sub>,  
20 InsP<sub>6</sub>, 5-PP-InsP<sub>5</sub>, 1/3-PP-InsP<sub>5</sub> and 1/3,5-(PP)<sub>2</sub>-InsP<sub>4</sub> were readily detected in shoot extracts  
21 of *A. thaliana* Col-0 seedlings. Surprisingly, comparable levels of 5-PP-InsP<sub>5</sub> and 1/3-PP-InsP<sub>5</sub>  
22 were observed. This represents a significant deviation from the general notion, derived from  
23 mammalian cell analysis, that 1-PP-InsP<sub>5</sub> represents the minor isomeric species. The *atipk1*  
24 mutant displayed decreased levels of PP-InsPs and InsP<sub>6</sub>, and a robust increase in  
25 Ins(1,3,4,5,6)P<sub>5</sub> s. In *atipk1* plants, 5-PP-InsP<sub>4</sub> was also detected by CE-ESI-MS, which was  
26 previously unsuccessfully tracked by [<sup>3</sup>H]-inositol labelling and SAX-HPLC analysis<sup>34</sup>. Analysis  
27 of *atmrp5* shoots revealed the expected elevated levels of 5-PP-InsP<sub>5</sub> and 1/3,5-(PP)<sub>2</sub>-InsP<sub>4</sub>,  
28 but not of 1/3-PP-InsP<sub>5</sub>. This analysis represents the first detailed elucidation of single isomer  
29 PP-InsP alterations in plants, underlining the value of the SIL-CE-ESI-MS method for  
30 dissecting PP-InsP isomers and relative abundances.

#### 31 32 **CE-ESI-MS to analyze *Dictyostelium discoideum* PP-InsP metabolism**

33 The social amoeba *Dictyostelium discoideum* possesses large amounts of PP-InsPs.  
34 However, this model organism contains different PP-InsPs isomers from those in mammals,  
35 yeast and plants, such as 6-PP-InsP<sub>5</sub> and 5,6-(PP)<sub>2</sub>-InsP<sub>4</sub><sup>9,35</sup>. This complexity is a challenge  
36 for ideal CE separation conditions. Employing a different BGE with decreased ionic strength  
37 and pH (30 mM ammonium acetate adjusted to pH 9.0 with NH<sub>4</sub>OH) led to enhanced resolution

1 of InsP<sub>6</sub> and more anionic species. Under these conditions, all possible PP-InsP<sub>5</sub> isomers,  
2 including non-natural ones obtained by chemical synthesis<sup>36–38</sup>, were separated and could  
3 thus be assigned in complex matrices (Figure 4a). This BGE also enabled the separation of  
4 all available InsP<sub>5</sub> isomers. We then performed CE-ESI-MS analyses of *D. discoideum*  
5 extracts (Figure 4b). As expected, 4/6-PP-InsP<sub>5</sub> was about twice as abundant as 5-PP-InsP<sub>5</sub>,  
6 while 1/3-PP-InsP<sub>5</sub> was present at around 5% of the whole PP-InsP<sub>5</sub> pool. We identified two  
7 (PP)<sub>2</sub>-InsP<sub>4</sub> isomers, 5,4/6-(PP)<sub>2</sub>-InsP<sub>4</sub>, and 1,5-(PP)<sub>2</sub>-InsP<sub>4</sub>. Peak assignment and  
8 quantification were conducted in a single run (30 minutes), and accurate mass information  
9 was provided simultaneously (Figure 4c).

10

### 11 **Endogenous inositol synthesis contributes to the InsP pools**

12 The ability of MS to capture isotopic mass differences is a significant advantage of the CE-  
13 ESI-MS protocol. For example, by using isotopically labeled metabolic precursors, the  
14 contribution to the InsP pool of both the inositol acquired from the milieu and from endogenous  
15 synthesis from glucose can now be assessed (Figure 1a). In SAX-HPLC analysis, inositol-free  
16 medium is used to improve [<sup>3</sup>H]-inositol labeling, with the tracer used at 0.5-1 μM  
17 concentration<sup>25</sup>. This method does not detect endogenously generated inositol. To assess the  
18 contribution of endogenous synthesis of inositol to InsP cellular pools, we performed an  
19 inositol titration curve. Wild type HCT116<sup>UCL</sup> were incubated for five days, the incubation time  
20 used for [<sup>3</sup>H]-inositol labeling to reach metabolic equilibrium (7-8 cell division cycles), in  
21 inositol-free DMEM in the presence of 1, 10 and 100 μM [<sup>13</sup>C<sub>6</sub>]-inositol. We observed a dose-  
22 dependent incorporation of [<sup>13</sup>C<sub>6</sub>]-inositol into the [<sup>13</sup>C<sub>6</sub>]InsP<sub>5</sub> and [<sup>13</sup>C<sub>6</sub>]InsP<sub>6</sub> pools (Figure 5a).  
23 Using 1 μM [<sup>13</sup>C<sub>6</sub>]-inositol, less than 20% of the InsP<sub>5</sub> and InsP<sub>6</sub> pools were synthesized from  
24 exogenously acquired inositol; this value increased to 90% using 100 μM. A reference value  
25 for inositol concentration in human serum is 30 μM<sup>39</sup>, available only to cells in direct contact  
26 with serum. We next performed a time course, incubating cells with [<sup>13</sup>C<sub>6</sub>]-inositol (10 μM) in  
27 inositol-free DMEM for 1, 3 and 5 days (Figure 5b). Initially, all InsP<sub>5</sub> and InsP<sub>6</sub> species were  
28 constituted of [<sup>12</sup>C]-inositol. By 24 h [<sup>13</sup>C<sub>6</sub>]InsP<sub>5</sub> and [<sup>13</sup>C<sub>6</sub>]InsP<sub>6</sub> became detectable,  
29 representing a small fraction of their respective pools. After five days, [<sup>13</sup>C<sub>6</sub>]InsP<sub>5</sub> and  
30 [<sup>13</sup>C<sub>6</sub>]InsP<sub>6</sub> represented two thirds of the InsP<sub>5</sub> and InsP<sub>6</sub> pools. These results indicate either  
31 a sluggish InsP<sub>5</sub> and InsP<sub>6</sub> turnover, even more lethargic than previously thought<sup>40</sup>, or an  
32 endogenous synthesis of [<sup>12</sup>C]-inositol that substantially contributes to the InsP<sub>5</sub> and InsP<sub>6</sub>  
33 pools.

34 The inositol phosphate synthase (IPS or MIPS) called ISYNA1 in mammals converts glucose-  
35 6-phosphate to Ins(3)P<sup>41</sup>. To study the contribution of endogenous inositol synthesis to InsP  
36 pools, we generated two independent HCT116<sup>UCL</sup> /SYNA1<sup>-/-</sup> clones using CRISPR. The two  
37 knockout clones, KO1 and KO2, were verified by sequencing (Supplementary Figure 8) and

1 western blot analysis (Figure 6a). The InsP<sub>6</sub> level as analyzed by PAGE was unaffected in the  
2 *ISYNA1*<sup>-/-</sup> clones (Figure 6b), and there was no growth defect in normal medium (Figure 6c).  
3 Titrating the medium with different inositol concentrations revealed 10 μM inositol as sufficient  
4 to guarantee wild type growth rate, while the absence of inositol dramatically reduced the  
5 growth of both clones (Figure 6d-f). To study the contribution of *ISYNA1* to the InsP pools, we  
6 incubated wild type HCT116<sup>UCL</sup> and *ISYNA1*<sup>-/-</sup> clones for 5 days in 25 mM [<sup>13</sup>C<sub>6</sub>]-glucose with  
7 1 or 10 μM inositol, and then extracted and analyzed the samples by CE-ESI-MS (Figure 6g).  
8 In wild type cells with only 1 μM inositol, roughly 60% of the InsP<sub>5</sub> and InsP<sub>6</sub> pools were  
9 generated by the endogenous conversion of [<sup>13</sup>C<sub>6</sub>]-glucose-6-phosphate to Ins(3)P, detected  
10 as [<sup>13</sup>C<sub>6</sub>]InsP<sub>5</sub> and [<sup>13</sup>C<sub>6</sub>]InsP<sub>6</sub>. Note that often 1 μM or less of inositol is used in [<sup>3</sup>H]-inositol  
11 labeling for SAX-HPLC experiments<sup>26,42</sup>. Our analysis, therefore, reveals that up to 60% of  
12 InsPs are not detected by traditional methods if inositol concentration is kept low to improve  
13 [<sup>3</sup>H]-inositol labeling efficiency. In the presence of a tenfold higher exogenous inositol  
14 concentration (10 μM), endogenously generated inositol contributed 15% to the InsP<sub>5</sub> and  
15 InsP<sub>6</sub> pools. Strikingly, we detected [<sup>13</sup>C<sub>6</sub>]InsP<sub>5</sub> and [<sup>13</sup>C<sub>6</sub>]InsP<sub>6</sub> in both *ISYNA1*<sup>-/-</sup>KO1 and  
16 *ISYNA1*<sup>-/-</sup>KO2, although to a lesser extent than in wild type cells (Figure 6h-j). This highly  
17 unexpected result indicates the existence of an alternative uncharacterized enzymology for  
18 inositol synthesis, underscoring the enormous potential of the CE-ESI-MS technique. This  
19 approach will be instrumental not only in elucidating the novel inositol synthetic route we have  
20 discovered, but also in any future assessment of inositol phosphate physiological functions  
21 across the kingdoms of life.

22

## 23 **Discussion**

24 The analysis of InsP and PP-InsP turnover in cells and tissues is a daunting challenge.  
25 Radiolabeling followed by SAX-HPLC has so far been the method of choice, as it provides the  
26 sensitivity needed for meaningful analyses of the less abundant species, with the advantage  
27 of selectively visualizing only InsPs and PP-InsPs when [<sup>3</sup>H]-labeled inositol is fed to cells.  
28 This approach, however, misses inositol endogenously synthesized from glucose, is restricted  
29 to specialized laboratories, is expensive, and time-consuming. While other approaches, such  
30 as [<sup>13</sup>C] labeling for NMR, PAGE, and HILIC-MS, have recently been developed to provide  
31 alternatives, a transformative approach is still missing.

32 Here, we have demonstrated that CE is an outstanding separation platform for InsPs and PP-  
33 InsPs. Moreover, CE coupling to an ESI-Q-TOF mass spectrometer facilitates parallel  
34 analyses of a multitude of analytes in a single run, requiring only 30 minutes and nL sample  
35 injection. According to the accurate mass information and identical mobility with (isotopic)  
36 standards, these densely charged species can now be readily assigned even in complex  
37 matrices. Additionally, the introduction of stable isotope labeled (SIL) reference compounds



1 allows for quantification and correction of matrix effects in samples such as those obtained  
2 from yeast extracts rich in polyphosphates, where drifts in migration times of several minutes  
3 were observed. Using this approach, we were able to quantify InsPs and PP-InsPs in different  
4 species, and in wild type and knock-out cell lines additionally treated with inhibitors of several  
5 enzymes. Given the rapidity of the analysis, measurement of technical replicates becomes  
6 possible, underlining the robustness and fidelity of the method. Using CE-ESI-MS, we have  
7 been able to extract essential new information from several samples. For example,  
8 Ins(1,3,4,5,6)P<sub>5</sub> concentrations are highly variable across different mammalian cell lines and  
9 whole organs. We also show that 1/3-PP-InsP<sub>5</sub> is not always the minor isomer present, as  
10 exemplified by our analysis of *A. thaliana* seedlings, raising questions concerning its potential  
11 regulatory effects. Moreover, SIL inositol and SIL D-glucose were used in pulse labeling  
12 experiments, demonstrating that SIL-CE-ESI-MS can be used to monitor and quantify inositol  
13 isomer turnover originating from different sources. At low (1 μM) exogenous inositol  
14 concentration, around 60% of cellular inositol was derived from glucose after 5 days of  
15 labeling. Yet, knockout of the only known glucose-6-phosphate utilizing inositol synthase in  
16 mammalian cells (ISYNA1) did not lead to cells incompetent in transforming D-glucose to  
17 inositol. This finding reveals that there must exist a yet uncharacterized biochemical pathway  
18 for the synthesis of inositol deriving its carbon skeleton from glucose. We thus conclude that  
19 SIL-CE-ESI-MS will open our eyes to cellular pathways we have previously been blind to.

20

## 21 **Methods**

### 22 **Materials and Reagents**

23 InsP<sub>6</sub>, Ins(1,3,4,5,6)P<sub>5</sub>, Ins(2,3,4,5,6)P<sub>5</sub>, Ins(1,2,3,4,6)P<sub>5</sub>, Ins(1,2,3,4,5)P<sub>5</sub>, Ins(1,3,4,5)P<sub>4</sub> and  
24 Ins(1,4,5)P<sub>3</sub> with purity more than 95-97% (<sup>31</sup>P NMR) were purchased from Slichem.  
25 Ins(1,3,4,6)P<sub>4</sub> and Ins(1,4,5,6)P<sub>4</sub> were obtained from Cayman. 1-PP-InsP<sub>5</sub>, 5-PP-InsP<sub>5</sub>, 6-PP-  
26 InsP<sub>5</sub> and 2-PP-InsP<sub>5</sub> were synthesized in-house (Jessen)<sup>36-38</sup>. Stable-isotope labelled (SIL)  
27 internal standards [<sup>13</sup>C<sub>6</sub>]1,5-(PP)<sub>2</sub>-InsP<sub>4</sub>, [<sup>13</sup>C<sub>6</sub>]5-PP-InsP<sub>5</sub>, [<sup>13</sup>C<sub>6</sub>]1-PP-InsP<sub>5</sub>, [<sup>13</sup>C<sub>6</sub>] InsP<sub>6</sub>, and  
28 [<sup>13</sup>C<sub>6</sub>]Ins(1,3,4,5,6)P<sub>5</sub> with purities higher than 96% were synthesized in-house (Fiedler)<sup>22,29</sup>.  
29 Concentrations of stock solutions of InsP and PP-InsP standards for quantification were  
30 determined by [<sup>1</sup>H] NMR and/or [<sup>31</sup>P] NMR as described below. Fused silica capillaries were  
31 obtained from CS-Chromatographie.

32

### 33 **CE-ESI-MS Analysis**

34 All experiments were performed on a bare-fused silica capillary with a length of 100 cm (50 μm  
35 internal diameter and 365 μm outer diameter) on an Agilent 7100 capillary electrophoresis  
36 system coupled to a Q-TOF (6520, Agilent) equipped with a commercial CE-MS adapter and

1 sprayer kit from Agilent. Prior to use, the capillary was flushed for 10 min with 1N NaOH,  
2 followed by water for 10 min, and background electrolyte (BGE) for 15 min. BGE A (35 mM  
3 ammonium acetate titrated by ammonia solution to pH 9.7) was employed for the analysis of  
4 all mammalian cell and tissue extracts, as well as *Saccharomyces cerevisiae* and *Arabidopsis*  
5 *thaliana* extracts. BGE B (30 mM ammonium acetate titrated by ammonia solution to pH 9.0)  
6 was used for *Dictyostelium discoideum*. Samples were injected by applying 50 mbar pressure  
7 for 10 s, corresponding to 0.5% of the total capillary volume (10 nL). In the study of the  
8 endogenous inositol synthesis, samples were injected with 100 mbar pressure for 10 s (20  
9 nL). After sample injection, a BGE post-plug was introduced by applying 50 mbar for 2 s. For  
10 each analysis, a constant CE current of either 23  $\mu$ A (BGE A) or 19  $\mu$ A (BGE B) was  
11 established by applying 30 kV over the capillary, which was kept at a constant temperature of  
12 25 °C.

13 The sheath liquid was composed of a water-isopropanol (1:1) mixture spiked with mass  
14 references. It was introduced at a constant flow rate of 1.5  $\mu$ L/min. ESI-TOF-MS was  
15 conducted in the negative ionization mode; the capillary voltage was set to -3000 V and stable  
16 ESI spray current at 2.1  $\mu$ A. For TOF-MS, the fragmentor, skimmer, and Oct RFV voltage was  
17 set to 140, 60, and 750 V, respectively. The temperature and flow rate of drying gas was  
18 250 °C and 8 L/min, respectively. Nebulizer gas pressure was 8 psi. Automatic recalibration  
19 of each acquired spectrum was performed using reference masses of reference standards  
20 (TFA anion, [M-H]<sup>-</sup>, 112.9855), and (HP-0921, [M-H+CH<sub>3</sub>COOH]<sup>-</sup>, 980.0163). Exact mass data  
21 were acquired at a rate of 1.5 spectra/s over a 60–1000 *m/z* range. Extracted ion  
22 electropherograms (EIEs) were created using a 10 ppm mass tolerance window for theoretical  
23 masses corresponding to the targeted inositol pyrophosphates and inositol phosphates.

24 Peak assignment of 1/3,5-(PP)<sub>2</sub>-InsP<sub>4</sub>, 5-PP-InsP<sub>5</sub>, 1/3-PP-InsP<sub>5</sub>, InsP<sub>6</sub> and Ins(1,3,4,5,6)P<sub>5</sub>  
25 in biological samples was achieved by accurate mass, isotopic pattern, and identical migration  
26 time. Ins(1,3,4,6)P<sub>4</sub>, Ins(1/3,4,5,6)P<sub>4</sub> and 4/6-PP-InsP<sub>5</sub> in biological samples were assigned  
27 by accurate mass and identical migration time with spiked standards. 5-PP-InsP<sub>4</sub> and 4/6,5-  
28 (PP)<sub>2</sub>-InsP<sub>4</sub> in biological samples were assigned by accurate mass and based on previous  
29 research<sup>9,26</sup>.

30 Quantification of PP-InsP and InsP in mammalian cells was performed with known amounts  
31 of individual isotopic standards spiked into the samples. The amount of isotopic internal  
32 standards (IS) that had to be added was delineated from the concentration of the respective  
33 analyte in the sample. Ratio of analyte peak area (Area)<sup>12C</sup>/ IS peak area (Area)<sup>13C</sup> is less than  
34 5 to ensure a linear relationship. IS stock solutions of 125  $\mu$ M [<sup>13</sup>C<sub>6</sub>]5-PP-InsP<sub>5</sub>, 500  $\mu$ M  
35 [<sup>13</sup>C<sub>6</sub>]InsP<sub>6</sub> and 500  $\mu$ M [<sup>13</sup>C<sub>6</sub>]Ins(1,3,4,5,6)P<sub>5</sub> were used for the spiking experiments. 0.4  $\mu$ L  
36 IS stock solution were added into 10  $\mu$ L samples before measurement. 5  $\mu$ M [<sup>13</sup>C<sub>6</sub>]5-PP-InsP<sub>5</sub>,  
37 20  $\mu$ M [<sup>13</sup>C<sub>6</sub>]InsP<sub>6</sub> and 20  $\mu$ M [<sup>13</sup>C<sub>6</sub>]Ins(1,3,4,5,6)P<sub>5</sub> were the final concentrations inside

1 klsamples. The calibration curve for each analyte was constructed at eight levels by regression  
2 of nominal analyte concentration against a ratio of analyte peak area (Area)<sup>12C</sup>/ IS peak area  
3 (Area)<sup>13C</sup> (Supplementary Figure 9). The calibration curves were linear and provided a  
4 coefficient of determination >0.997 over the investigated range of concentrations (0.25-25 µM  
5 for 5-PP-InsP<sub>5</sub>, 1.0-100 µM for InsP<sub>6</sub> and Ins(1,3,4,5,6)P<sub>5</sub>). For quantification, two technical  
6 replicates were conducted for each sample.

7 Quantification of InsP and PP-InsP in tissue extracts, *Saccharomyces cerevisiae*, *Arabidopsis*  
8 *thaliana*, and *Dictyostelium discoideum* extracts was performed by comparing analyte peak  
9 areas with the respective peak areas of SIL internal standards with known concentrations.  
10 Concentrations of SIL internal standard solutions were determined by quantitative <sup>31</sup>P and <sup>1</sup>H  
11 NMR against a certified reference standard (phosphoacetic acid, TraceCERT® Merk 96708-  
12 1G).

13

#### 14 **Maintenance and manipulation of mammalian cell lines**

15 HCT116<sup>NIH</sup> and HCT116<sup>NIH</sup> *PIIP5K*<sup>-/-</sup> cells<sup>43</sup> were grown in DMEM (Gibco) supplemented with  
16 4.5 g/L glucose and 10 % heat inactivated FBS (Gibco). HCT116<sup>UCL</sup> (obtained from European  
17 Collection of Authenticated Cell Cultures [ECACC]) and HCT116<sup>UCL</sup> *IP6K1,2*<sup>-/-</sup> cells<sup>44</sup> were  
18 cultured in DMEM supplemented with 10% FBS (Sigma) and 4.5 g/L glucose. All cells were  
19 grown in a humidified atmosphere with 5% CO<sub>2</sub>. InsP levels were modulated by incubating the  
20 cells for 60 min with 10 mM NaF or for 30 min with 2.5 µM quercetin<sup>28</sup> prior to harvesting.

21 For inositol limitation or [<sup>13</sup>C<sub>6</sub>]-inositol labelling experiments, inositol-free DMEM (MP  
22 Biomedicals) with 10% dialyzed FBS (Sigma) was used. Normal inositol (Sigma) or [<sup>13</sup>C<sub>6</sub>]-  
23 inositol<sup>29</sup> were supplemented as appropriate. Cells were acclimatized to 10 µM inositol in  
24 inositol-free DMEM for one week before starting labelling experiments. For [<sup>13</sup>C<sub>6</sub>]-glucose  
25 (Sigma) labelling experiments, DMEM lacking both inositol and glucose (Thermo Fisher) was  
26 used, using 10% dialyzed FBS. Cells were washed twice in the relevant starvation medium  
27 before incubation.

28

#### 29 **Mammalian cell growth assay**

30 To measure cell growth, the sulforhodamine B (SRB) assay was performed<sup>45</sup>. Cells were  
31 seeded into 96 well plates. After 24 h, the medium was removed, wells were washed, then  
32 100 µL treatment medium was added. At each timepoint, cells were fixed in 10%  
33 trichloroacetic acid. Fixed plates were stained with 0.05% sulforhodamine B (Sigma) in 1%  
34 acetic acid, and fixed dye was solubilised in 10 mM Tris base before reading absorbance at  
35 500 nm using a spectrophotometer.

1 To measure cell volume, 80-90% confluent cells were trypsinised and resuspended in growth  
2 medium. A Multisizer 4 (Beckman Coulter) machine was used, following the manufacturer  
3 instruction.

4

#### 5 **Generation of ISYNA1 KO cell lines**

6 The human colon carcinoma cell line HCT116 was used to generate knockouts as it is pseudo-  
7 diploid, and has easily detectable amounts of InsP<sub>6</sub> and InsP<sub>7</sub><sup>23</sup>. The Alt-R CRISPR-Cas9  
8 (Integrated DNA Technologies) system was used, with guide sequence 5'-  
9 CCAAUCGACUGCGUU-3'. CRISPR components were introduced into the cells using a Neon  
10 electroporator (Thermo Fisher) and cells plated into 96 well plates using limiting dilution.  
11 Colonies were screened by western blotting using anti-ISYNA1 antibody (Santa Cruz sc-  
12 271830). Positive knockout clones were further confirmed by PCR and Sanger sequencing-  
13 based analysis (Genewiz CRISPR Analysis Package).

14

#### 15 **Purification of inositol phosphates by titanium dioxide pulldown**

16 Extraction of inositol phosphates was performed according to the literature<sup>44</sup>. Briefly, 80-90%  
17 confluent cells were extracted using 1 M perchloric acid as described below. Titanium dioxide  
18 beads (Titansphere TiO<sub>2</sub> 5 µm; GL Sciences) were used to pull down inositol phosphates,  
19 which were eluted using 3% ammonium hydroxide. The ammonia was eliminated and the  
20 samples concentrated using a speedvac evaporator for 1-3 h at 40°C or 60°C. For InsPs  
21 analysis by PAGE, the extracts were normalized to protein concentration and resolved using  
22 35% PAGE gels, as previously described<sup>19</sup>. Inositol phosphates were visualized by Toluidine  
23 blue (Sigma) staining. A desktop scanner (Epson) was used to record the PAGE result.

24

#### 25 **Preparing cell extracts for CE-ESI-MS**

##### 26 *Mammalian cells:*

27 Cells (8 million HCT116<sup>UCL</sup> cells, HCT116<sup>UCL</sup> *IP6K1,2*<sup>-/-</sup> cells and HCT116<sup>NIH</sup> *PP1P5K*<sup>-/-</sup> cells;  
28 6 million HCT116<sup>NIH</sup> cells) were seeded into 15 cm dishes and allowed to grow for 48 hours  
29 (HCT116<sup>UCL</sup> and HCT116<sup>UCL</sup> *IP6K1,2*<sup>-/-</sup> cells) or 72 hours (HCT116<sup>NIH</sup> and HCT116<sup>NIH</sup> *PP1P5K*<sup>-/-</sup>  
30 <sup>-/-</sup> cells) until 80-90% confluent. To harvest, dishes were quickly washed twice with cold PBS,  
31 then incubated with 1-5 mL cold 1 M perchloric acid on ice for 10 min. Acidic extracts were  
32 then collected from the plates, and inositol phosphates and other small polar molecules  
33 extracted using titanium dioxide beads<sup>23,44</sup>. To determine protein concentrations, post-  
34 extraction dishes were washed twice in PBS and proteins were solubilized via addition of  
35 1.5 mL cell lysis buffer (0.1 % SDS in 0.1 M NaOH) followed by incubation for 15 min at room  
36 temperature. Cell extracts were then pelleted. Protein contents of cell lysates were determined

1 using the DC protein assay (Biorad) with BSA as calibration standard. To provide cell volume  
2 values and cell counts for normalization, parallel dishes were prepared and trypsinized.  
3 For SIL-CE-ESI-MS, cells were seeded into 6 well plates. After 24 h, the medium was  
4 removed, cells were washed, then 2 mL treatment medium was added. Cells were harvested  
5 by trypsinization to maximize yield, before extraction with perchloric acid and TiO<sub>2</sub> beads.  
6 Parallel dishes were prepared to provide cell counts and protein concentration values for  
7 normalization.

8

9 *Plants:*

10 Arabidopsis seeds were surface sterilized and sown onto half-strength Murashige and Skoog  
11 (MS) medium supplemented with 1% succrose<sup>34</sup>. Plants were grown under 16h/8h day/night  
12 conditions at 22°C/20°C for 14 days. Light was provided by white LEDs ("True daylight",  
13 Polyklima). Shoots (150-180 mg, fresh weight) were shock-frozen in liquid nitrogen,  
14 homogenized and immediately resuspended in 1 M perchloric acid (SigmaAldrich). Titanium  
15 dioxide purification of inositol phosphates was carried out as described above.

16

17 *D. discoideum*

18 Wild type amoeba *D. discoideum* AX2, obtained from the Dicty Stock Center (Northwestern  
19 University, Chicago, USA), was grown in SIH defined minimal media (Formedium) at 20 °C in  
20 a flask with moderate shaking to a cell density of 3-4x10<sup>6</sup> cells/ml. Twenty million cells were  
21 harvested by centrifugation (1 000 g; 5 min), washed in KK2 buffer (20 mM K-Phosphate buffer  
22 pH 6.8), resuspended in 500 µL ice cold perchloric acid solution (1 M perchloric acid, 5 mM  
23 EDTA) and incubated on ice for 10 min, gently mixing the cell suspension every two min. The  
24 cell suspension was centrifuged (15 000 g; 5 min at 4 °C) and the supernatant subject to TiO<sub>2</sub>  
25 purification as described.

26

27 *S. cerevisiae:*

28 Wild type yeast (BY4741) was grown in Complete Supplement Mixture (SCM) media  
29 (Formedium) overnight with shaking at 30°C to logarithmic phase (OD<sub>600</sub>=1-3). Forty OD<sub>600</sub>  
30 units were harvested by centrifugation (1 000 g; 5 min), washed with ice cold water and  
31 resuspended in 500 µL ice cold perchloric acid solution (1 M perchloric acid, 5 mM EDTA).  
32 After adding ~300 µL acid-washed glass beads (Sigma Aldrich) yeast were vigorously  
33 vortexed for 5 min at 4 °C. The lysate was centrifuged (15 000 g; 5 min at 4 °C) and the  
34 supernatant (acid extract) subject to TiO<sub>2</sub> purification as described.

35

36

37

## 1 **Inositol phosphate analysis by SAX-HPLC**

2 Analysis of InsP pathways after [<sup>3</sup>H]-inositol radiolabeling was carried out as previously  
3 described<sup>25</sup>. Briefly, cells were seeded into 6 well plates and grown in the presence of [<sup>3</sup>H]-  
4 inositol for 5 days to ~80% confluence. Treatment with NaF (10 mM) was for 1 hour. Cells  
5 were then washed with ice-cold PBS and extracted with perchloric acid, and after  
6 neutralization processed for SAX-HPLC analysis.

## 7 8 **Western blotting**

9 Cells were lysed in TX buffer (50 mM HEPES pH 7.4, 1 mM EDTA, 10% glycerol, 1% Triton  
10 X-100, 50 mM sodium fluoride, 5 mM sodium pyrophosphate) supplemented with protease  
11 and phosphatase inhibitor cocktails (Sigma). Lysates were cleared by centrifugation at 18,000  
12 rpm for 5 min at 4°C, and protein concentrations measured by DC Protein Assay (Bio-Rad).  
13 Lysates were resolved using NuPAGE 4-12% bis-tris gels (Life Technologies) and proteins  
14 transferred to nitrocellulose membranes. Ponceau S solution (0.1% Ponceau S [Sigma] in 1%  
15 acetic acid) was used to confirm equal loading. Membranes were blocked for 1 hour in 5%  
16 non-fat milk in TBS-T (10 mM Tris base, 140 mM NaCl, 0.05% Tween) then blotted for the  
17 following primary antibodies at 1:100-1:1000 overnight in 3% milk: IP6K1 (HPA040825), IP6K2  
18 (HPA070811), IPPK (HPA020603; Sigma), ISYNA1 (sc 271830), actin (sc-1616; Santa Cruz),  
19 histone H3 (ab1791; Abcam). Secondary HRP-conjugated antibodies (Sigma) were diluted in  
20 3% milk. Signal was detected using Luminata Crescendo Western Substrate (Merck Millipore)  
21 and Amersham Hyperfilm (VWR) and a film developer.

22

23

## 24 **References**

- 25 1. Irvine, R. F. & Schell, M. J. Back in the water: the return of the inositol phosphates. *Nat.*  
26 *Rev. Mol. Cell Biol.* **2**, 327–338 (2001).
- 27 2. Shears, S. B. Inositol pyrophosphates: why so many phosphates? *Adv. Biol. Regul.* **57**,  
28 203–216 (2015).
- 29 3. Wilson, M. S. C., Livermore, T. M. & Saiardi, A. Inositol pyrophosphates: between  
30 signalling and metabolism. *Biochem. J.* **452**, 369–379 (2013).
- 31 4. Shears, S. B. Intimate connections: Inositol pyrophosphates at the interface of metabolic  
32 regulation and cell signaling. *J. Cell. Physiol.* **233**, 1897–1912 (2018).
- 33 5. Illies, C. *et al.* Requirement of inositol pyrophosphates for full exocytotic capacity in  
34 pancreatic beta cells. *Science* **318**, 1299–1302 (2007).
- 35 6. Szijgyarto, Z., Garedew, A., Azevedo, C. & Saiardi, A. Influence of inositol pyrophosphates  
36 on cellular energy dynamics. *Science* **334**, 802–805 (2011).
- 37 7. Wild, R. *et al.* Control of eukaryotic phosphate homeostasis by inositol polyphosphate  
38 sensor domains. *Science* **352**, 986–990 (2016).

- 1 8. Pisani, F. *et al.* Analysis of Dictyostelium discoideum inositol pyrophosphate metabolism  
2 by gel electrophoresis. *PLoS one* **9**, e85533 (2014).
- 3 9. Laussmann, T., Reddy, K. M., Reddy, K. K., Falck, J. R. & Vogel, G. Diphospho-my-  
4 inositol phosphates from Dictyostelium identified as D-6-diphospho-my-  
5 inositol pentakisphosphate and D-5,6-bisdiphospho-my-  
6 inositol tetrakisphosphate. *Biochem. J.* **322**, 31–33 (1997).
- 7 10. Wilson, M. S. C. & Saiardi, A. Importance of Radioactive Labelling to Elucidate Inositol  
8 Polyphosphate Signalling. *Top. Curr. Chem.* **375**, 14 (2017).
- 9 11. Whitfield, H. *et al.* An ATP-responsive metabolic cassette comprised of inositol  
10 tris/tetrakisphosphate kinase 1 (ITPK1) and inositol pentakisphosphate 2-kinase (IPK1)  
11 buffers diphosphoinositol phosphate levels. *Biochem. J.* **477**, 2621–2638 (2020).
- 12 12. Mayr, G. W. A novel metal-dye detection system permits picomolar-range h.p.l.c. analysis  
13 of inositol polyphosphates from non-radioactively labelled cell or tissue specimens.  
14 *Biochem. J.* **254**, 585–591 (1988).
- 15 13. Desfougères, Y., Wilson, M. S. C., Laha, D., Miller, G. J. & Saiardi, A. ITPK1 mediates the  
16 lipid-independent synthesis of inositol phosphates controlled by metabolism. *Proc. Natl.*  
17 *Acad. Sci. U.S.A.* **116**, 24551–24561 (2019).
- 18 14. Laha, D. *et al.* Arabidopsis ITPK1 and ITPK2 Have an Evolutionarily Conserved Phytic  
19 Acid Kinase Activity. *ACS Chem. Biol.* **14**, 2127–2133 (2019).
- 20 15. Liu, X., Villalta, P. W. & Sturla, S. J. Simultaneous determination of inositol and inositol  
21 phosphates in complex biological matrices: quantitative ion-exchange  
22 chromatography/tandem mass spectrometry. *Rapid Commun. Mass Spectrom.* **23**, 705–  
23 712 (2009).
- 24 16. Ito, M. *et al.* Hydrophilic interaction liquid chromatography-tandem mass spectrometry for  
25 the quantitative analysis of mammalian-derived inositol poly/pyrophosphates. *J.*  
26 *Chromatogr. A* **1573**, 87–97 (2018).
- 27 17. Berridge, M. J., Dawson, R. M., Downes, C. P., Heslop, J. P. & Irvine, R. F. Changes in  
28 the levels of inositol phosphates after agonist-dependent hydrolysis of membrane  
29 phosphoinositides. *Biochem. J.* **212**, 473–482 (1983).
- 30 18. Streb, H., Irvine, R. F., Berridge, M. J. & Schulz, I. Release of Ca<sup>2+</sup> from a  
31 nonmitochondrial intracellular store in pancreatic acinar cells by inositol-1,4,5-  
32 trisphosphate. *Nature* **306**, 67–69 (1983).
- 33 19. Losito, O., Szijgyarto, Z., Resnick, A. C. & Saiardi, A. Inositol pyrophosphates and their  
34 unique metabolic complexity: analysis by gel electrophoresis. *PLoS one* **4**, e5580 (2009).
- 35 20. Buscher, B.A.P., Hofte, A.J.P., Tjaden, U.R. & van der Greef, J. On-line electro dialysis-  
36 capillary zone electrophoresis-mass spectrometry of inositol phosphates in complex  
37 matrices. *J. Chromatogr. A* **777**, 51–60 (1997).
- 38 21. Gu, C., Wilson, M. S. C., Jessen, H. J., Saiardi, A. & Shears, S. B. Inositol Pyrophosphate  
39 Profiling of Two HCT116 Cell Lines Uncovers Variation in InsP8 Levels. *PLoS one* **11**,  
40 e0165286 (2016).
- 41 22. Puschmann, R., Harmel, R. K. & Fiedler, D. Scalable Chemoenzymatic Synthesis of  
42 Inositol Pyrophosphates. *Biochemistry* **58**, 3927–3932 (2019).
- 43 23. Wilson, M. S. C., Bulley, S. J., Pisani, F., Irvine, R. F. & Saiardi, A. A novel method for the  
44 purification of inositol phosphates from biological samples reveals that no phytate is  
45 present in human plasma or urine. *Open Biol.* **5**, 150014 (2015).
- 46 24. Shears, S. B. Understanding the biological significance of diphosphoinositol  
47 polyphosphates ('inositol pyrophosphates'). *Bioche. Soc. Symp.* 211–221 (2007).

- 1 25. Azevedo, C. & Saiardi, A. Extraction and analysis of soluble inositol polyphosphates from  
2 yeast. *Nat. Protoc.* **1**, 2416–2422 (2006).
- 3 26. Wilson, M. S., Jessen, H. J. & Saiardi, A. The inositol hexakisphosphate kinases IP6K1  
4 and -2 regulate human cellular phosphate homeostasis, including XPR1-mediated  
5 phosphate export. *J. Biol. Chem.* **294**, 11597–11608 (2019).
- 6 27. Menniti, F. S., Miller, R. N., Putney, J. W., JR & Shears, S. B. Turnover of inositol  
7 polyphosphate pyrophosphates in pancreatoma cells. *J. Biol. Chem.* **268**, 3850–3856  
8 (1993).
- 9 28. Gu, C. *et al.* Inhibition of Inositol Polyphosphate Kinases by Quercetin and Related  
10 Flavonoids: A Structure-Activity Analysis. *J. Med. Chem.* **62**, 1443–1454 (2019).
- 11 29. Harmel, R. K. *et al.* Harnessing <sup>13</sup>C-labeled myo-inositol to interrogate inositol phosphate  
12 messengers by NMR. *Chem. Sci.* **10**, 5267–5274 (2019).
- 13 30. Desai, M. *et al.* Two inositol hexakisphosphate kinases drive inositol pyrophosphate  
14 synthesis in plants. *Plant J.* **80**, 642–653 (2014).
- 15 31. Dong, J. *et al.* Inositol Pyrophosphate InsP<sub>8</sub> Acts as an Intracellular Phosphate Signal in  
16 Arabidopsis. *Mol. Plant* **12**, 1463–1473 (2019).
- 17 32. Saiardi, A., Caffrey, J. J., Snyder, S. H. & Shears, S. B. Inositol polyphosphate multikinase  
18 (ArgRIII) determines nuclear mRNA export in *Saccharomyces cerevisiae*. *FEBS Lett.* **468**,  
19 28–32 (2000).
- 20 33. Nagy, R. *et al.* The Arabidopsis ATP-binding cassette protein AtMRP5/AtABCC5 is a high  
21 affinity inositol hexakisphosphate transporter involved in guard cell signaling and phytate  
22 storage. *J. Biol. Chem.* **284**, 33614–33622 (2009).
- 23 34. Laha, D. *et al.* VIH2 Regulates the Synthesis of Inositol Pyrophosphate InsP<sub>8</sub> and  
24 Jasmonate-Dependent Defenses in Arabidopsis. *Plant Cell* **27**, 1082–1097 (2015).
- 25 35. Laussmann, T., Eujen, R., Weisshuhn, C. M., Thiel, U. & Vogel, G. Structures of  
26 diphospho-myo-inositol pentakisphosphate and bisdiphospho-myo-inositol  
27 tetrakisphosphate from *Dictyostelium* resolved by NMR analysis. *Biochem. J.* **315**, 715–  
28 720 (1996).
- 29 36. Capolicchio, S., Thakor, D. T., Linden, A. & Jessen, H. J. Synthesis of unsymmetric  
30 diphospho-inositol polyphosphates. *Angew. Chem. Int. Ed.* **52**, 6912–6916 (2013).
- 31 37. Capolicchio, S., Wang, H., Thakor, D. T., Shears, S. B. & Jessen, H. J. Synthesis of  
32 densely phosphorylated bis-1,5-diphospho-myo-inositol tetrakisphosphate and its  
33 enantiomer by bidirectional P-anhydride formation. *Angew. Chem. Int. Ed.* **53**, 9508–9511  
34 (2014).
- 35 38. Pavlovic, I., Thakor, D. T. & Jessen, H. J. Synthesis of 2-diphospho-myo-inositol 1,3,4,5,6-  
36 pentakisphosphate and a photocaged analogue. *Org. Biomol. Chem.* **14**, 5559–5562  
37 (2016).
- 38 39. Leung, K.-Y., Mills, K., Burren, K. A., Copp, A. J. & Greene, N. D. E. Quantitative analysis  
39 of myo-inositol in urine, blood and nutritional supplements by high-performance liquid  
40 chromatography tandem mass spectrometry. *J. chromatogr. B* **879**, 2759–2763 (2011).
- 41 40. Shears, S. B. Assessing the omnipotence of inositol hexakisphosphate. *Cell. Signal.* **13**,  
42 151–158 (2001).
- 43 41. Ju, S., Shaltiel, G., Shamir, A., Agam, G. & Greenberg, M. L. Human 1-D-myo-inositol-3-  
44 phosphate synthase is functional in yeast. *J. Biol. Chem.* **279**, 21759–21765 (2004).
- 45 42. Dovey, C. M. *et al.* MLKL Requires the Inositol Phosphate Code to Execute Necroptosis.  
46 *Mol. Cell* **70**, 936-948.e7 (2018).



- 1 43. Gu, C. *et al.* KO of 5-InsP<sub>7</sub> kinase activity transforms the HCT116 colon cancer cell line  
2 into a hypermetabolic, growth-inhibited phenotype. *Proc. Natl. Acad. Sci. U.S.A.* **114**,  
3 11968–11973 (2017).
- 4 44. Wilson, M. S. & Saiardi, A. Inositol Phosphates Purification Using Titanium Dioxide Beads.  
5 *Bio Protoc.* **8** (2018).
- 6 45. Orellana, E. A. & Kasinski, A. L. Sulforhodamine B (SRB) Assay in Cell Culture to  
7 Investigate Cell Proliferation. *Bio Protoc.* **6** (2016).
- 8  
9

## 1 Figures & legends

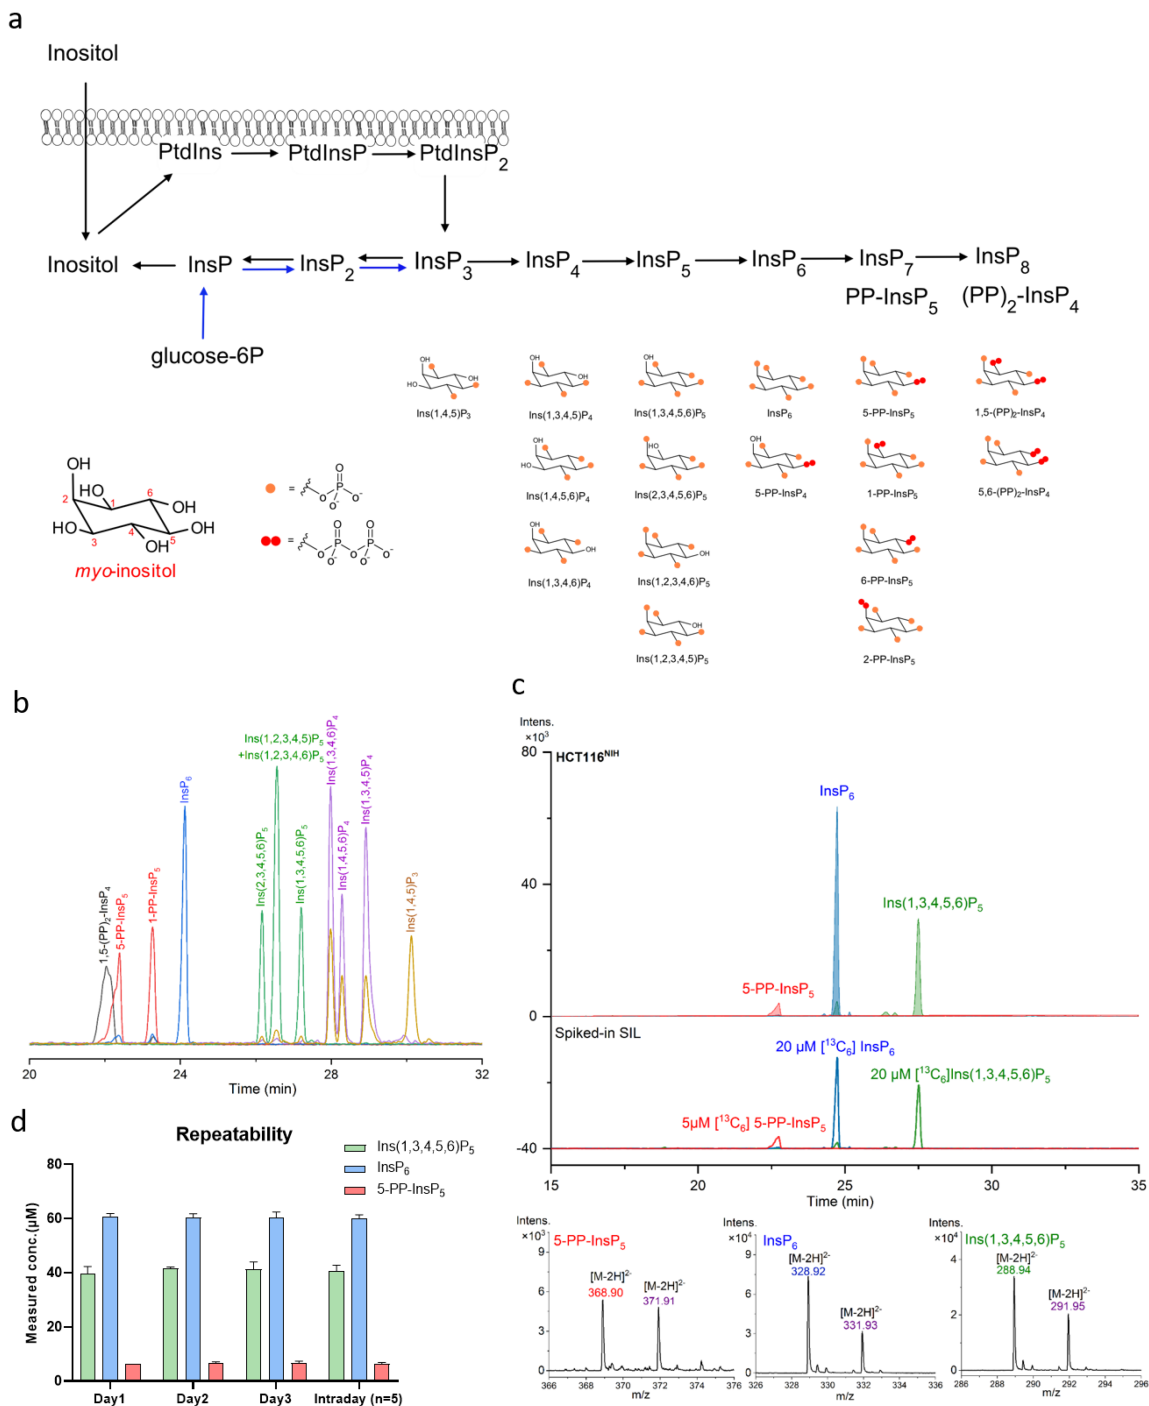

2  
3 Figure 1 **Separation of PP-InsP and InsP by CE-ESI-MS.** (a) Simplified biosynthesis of  
4 inositol phosphate (InsPs) and inositol pyrophosphates (PP-InsPs) from lipid PInsP<sub>2</sub> and  
5 glucose-6P, with the structures of InsPs and PP-InsPs that can be currently resolved by CE-  
6 ESI-MS. The metabolic pathways for inositol (pyro)phosphates in mammals are shown in  
7 Supplementary Fig. 1; (b) Separation of PP-InsP and InsP standards by CE-ESI-MS. BGE:  
8 35 mM ammonium acetate titrated with ammonium hydroxide to pH 9.7, CE voltage: 30 kV,  
9 CE current: 23 μA, injection: 50 mbar, 10 s (10 nL), solutes: 5 μM for Ins(2,3,4,5,6)P<sub>5</sub>,  
10 Ins(1,3,4,5,6)P<sub>5</sub>, Ins(1,2,3,4,6)P<sub>5</sub>, Ins(1,2,3,4,5)P<sub>5</sub>, InsP<sub>6</sub>, 5-PP-InsP<sub>5</sub>, 1-PP-InsP<sub>5</sub> and 1,5-

1 (PP)<sub>2</sub>-InsP<sub>4</sub>, 20 µg/mL for Ins(1,3,4,5)P<sub>4</sub> and Ins(1,3,4,6)P<sub>4</sub>, 8 µg/mL for Ins(1,4,5,6)P<sub>4</sub> and 10  
2 µg/mL for Ins(1,4,5)P<sub>3</sub>; **(c)** Extracted ion electropherograms (EIEs) of the main inositol  
3 (pyro)phosphates in HCT116<sup>NIH</sup> and spiked stable isotopic labelled (SIL) internal standards 20  
4 µM [<sup>13</sup>C<sub>6</sub>]Ins(1,3,4,5,6)P<sub>5</sub>, 20 µM [<sup>13</sup>C<sub>6</sub>]InsP<sub>6</sub> and 5 µM [<sup>13</sup>C<sub>6</sub>] 5-PP-InsP<sub>5</sub>. The InsP species  
5 Ins(1,3,4,5,6)P<sub>5</sub>, InsP<sub>6</sub>, and 5-PP-InsP<sub>5</sub> in HCT116<sup>NIH</sup> were assigned by their accurate mass,  
6 and identical migration time with spiked SIL standards; **(d)** Intra- and interday repeatability of  
7 the inositol (pyro)phosphate analysis by CE-ESI-MS; error bars represent the standard  
8 deviation, n=5.

9  
10  
11  
12  
13  
14  
15  
16  
17  
18  
19  
20  
21  
22  
23  
24  
25  
26  
27  
28  
29  
30  
31  
32  
33  
34  
35  
36  
37

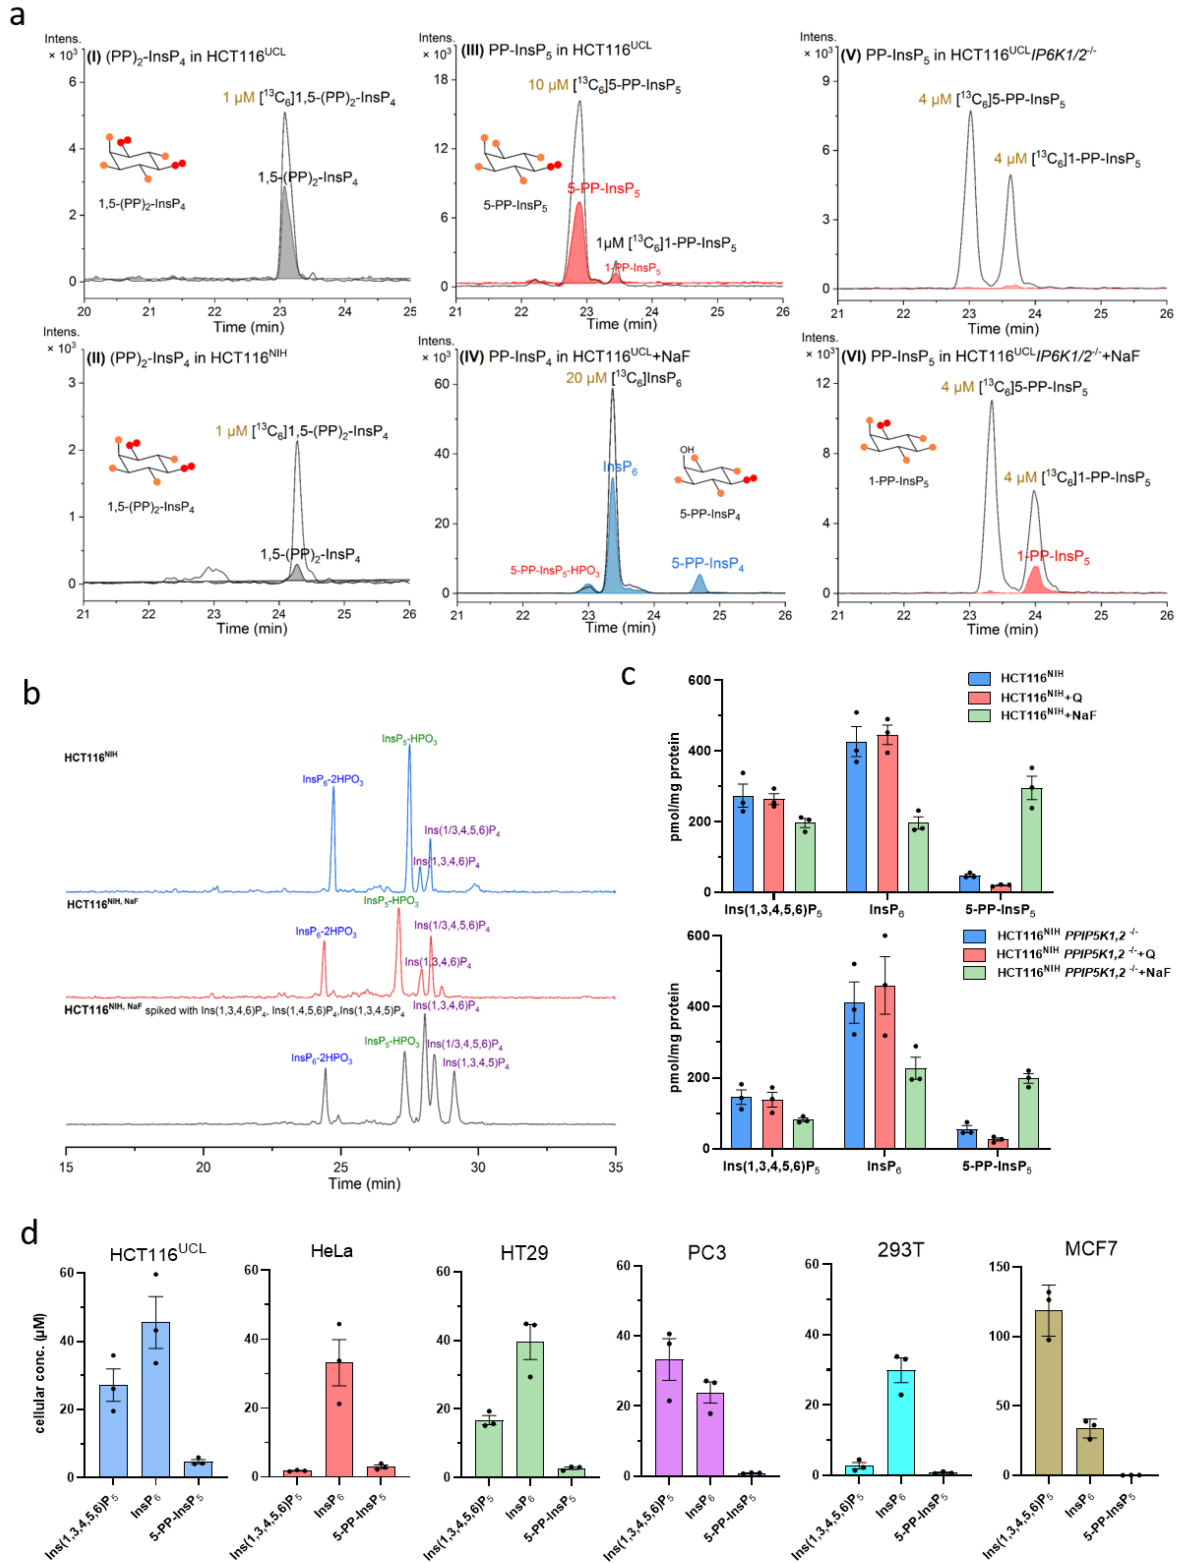

1

2 **Figure 2. CE-ESI-MS analysis of mammalian PP-InsP and InsP metabolism. (a)**  
 3 Mammalian cell extracts were analysed by CE-ESI-MS after spiking the indicated amount  
 4 (yellow) of stable isotopic standard. Extracted ion electropherograms of 1,5-(PP)<sub>2</sub>-InsP<sub>4</sub> in  
 5 HCT116<sup>UCL</sup> (I) and HCT116<sup>NIH</sup> (II) spiked with [<sup>13</sup>C<sub>6</sub>] 1,5-(PP)<sub>2</sub>-InsP<sub>4</sub>, (III) PP-InsP<sub>5</sub> in  
 6 HCT116<sup>UCL</sup>, major 5-PP-InsP<sub>5</sub> and minor 1-PP-InsP<sub>5</sub>, (IV) 5-PP-InsP<sub>4</sub> in HCT116<sup>UCL</sup> cells with

1 NaF treatment, (V) no measurable PP-InsP<sub>5</sub> in HCT116<sup>UCL</sup>*IP6K1,2*<sup>-/-</sup>, (VI) 1-PP-InsP<sub>5</sub> is  
2 detectable in HCT116<sup>UCL</sup>*IP6K1,2*<sup>-/-</sup> cells after 1 h sodium fluoride (NaF) treatment; **(b)** analysis  
3 of InsP<sub>4</sub> isomers in HCT116<sup>NIH</sup>, HCT116<sup>NIH,NaF</sup> and HCT116<sup>NIH,NaF</sup> spiked with Ins(1,3,4,6)P<sub>4</sub> (2  
4 µg/mL), Ins(1,4,5,6)P<sub>4</sub> (1 µg/mL) and Ins(1,3,4,5)P<sub>4</sub> (2 µg/mL); **(c)** Inositol (pyro)phosphate  
5 levels in HCT116<sup>NIH</sup> and HCT116<sup>NIH</sup>*PPIP5K1,2*<sup>-/-</sup> cells, without treatment or after incubation  
6 with NaF or inositol polyphosphate kinase (IPMK) inhibitor quercetin (2.5 µM for 30 min). Bars  
7 are means ± SEM from three independent experiments, individual values are shown by dots;  
8 **(d)** Cellular concentration of InsPs in the immortal human cell lines HCT116<sup>UCL</sup>, HeLa, HT29,  
9 293T, PC3, and MCF7. Concentrations varying between 2-120 µM Ins(1,3,4,5,6)P<sub>5</sub>, 24-46 µM  
10 InsP<sub>6</sub> and 0-5 µM 5-PP-InsP<sub>5</sub> were found. Data are means ± SEM from three independent  
11 experiments. InsP levels normalized by protein content among these cells are shown in  
12 Supplementary Fig. 4.

13

14

15

16

17

18

19

20

21

22

23

24

25

26

27

28

29

30

31

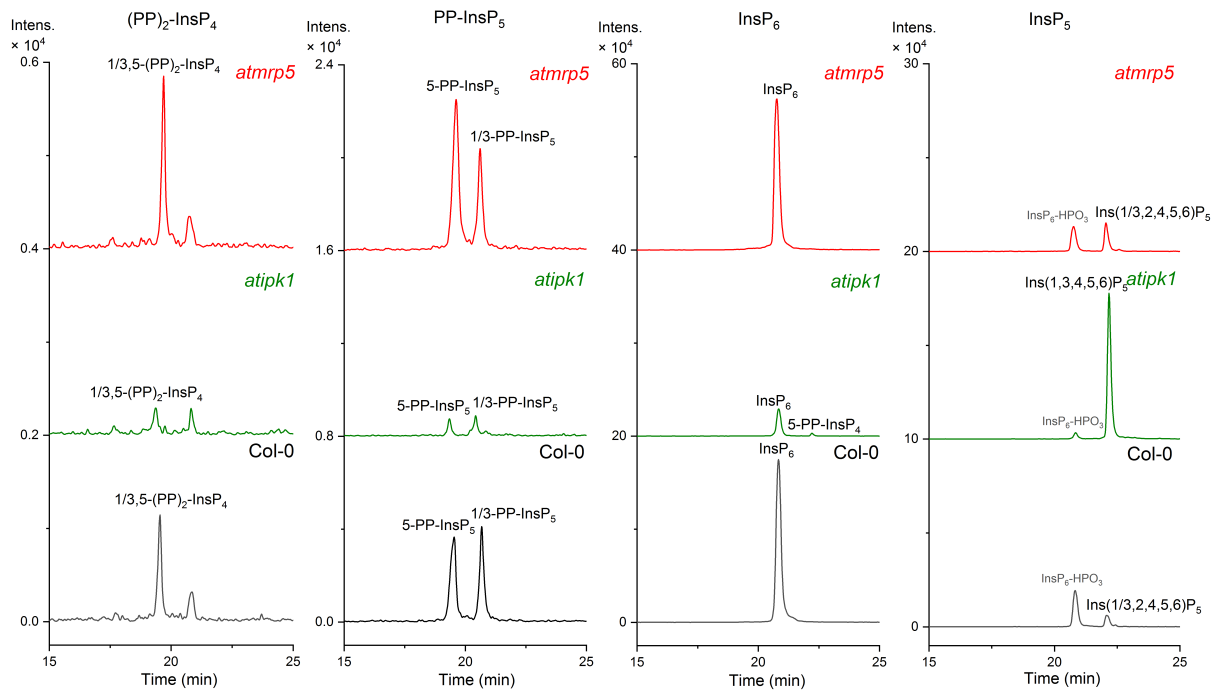

1

2 **Figure 3 CE-ESI-MS analysis of PP-InsP in *Arabidopsis thaliana* shoots.** Shoot extracts  
3 from wild type (Col-0), *atipk1* and *atmrp5* mutant plants were analysed to assess the presence  
4 of InsP<sub>5</sub>, InsP<sub>6</sub>, 5-PP-InsP<sub>5</sub>, and 1,5-(PP)<sub>2</sub>-InsP<sub>4</sub>. InsP<sub>5</sub> isomer composition differed in the  
5 different genotypes: Ins(1/3,2,4,5,6)P<sub>5</sub> is present in Col-0 and the *mrp5* mutant, whereas  
6 Ins(1,3,4,5,6)P<sub>5</sub> was detected in *atipk1* plants. A decreased level of 1,5-(PP)<sub>2</sub>-InsP<sub>4</sub>, 5-PP-  
7 InsP<sub>5</sub>, 1-PP-InsP<sub>5</sub>, InsP<sub>6</sub>, and increased level of 5-PP-InsP<sub>4</sub> and Ins(1,3,4,5,6)P<sub>5</sub> were  
8 observed for the *atipk1* mutant. In the *atmrp5* mutant, levels of 1,5-(PP)<sub>2</sub>-InsP<sub>4</sub> and 5-PP-InsP<sub>4</sub>  
9 were increased. The electropherograms are representative of independent biological  
10 duplicates giving comparable results.

11

12

13

14

15

16

17

18

19

20

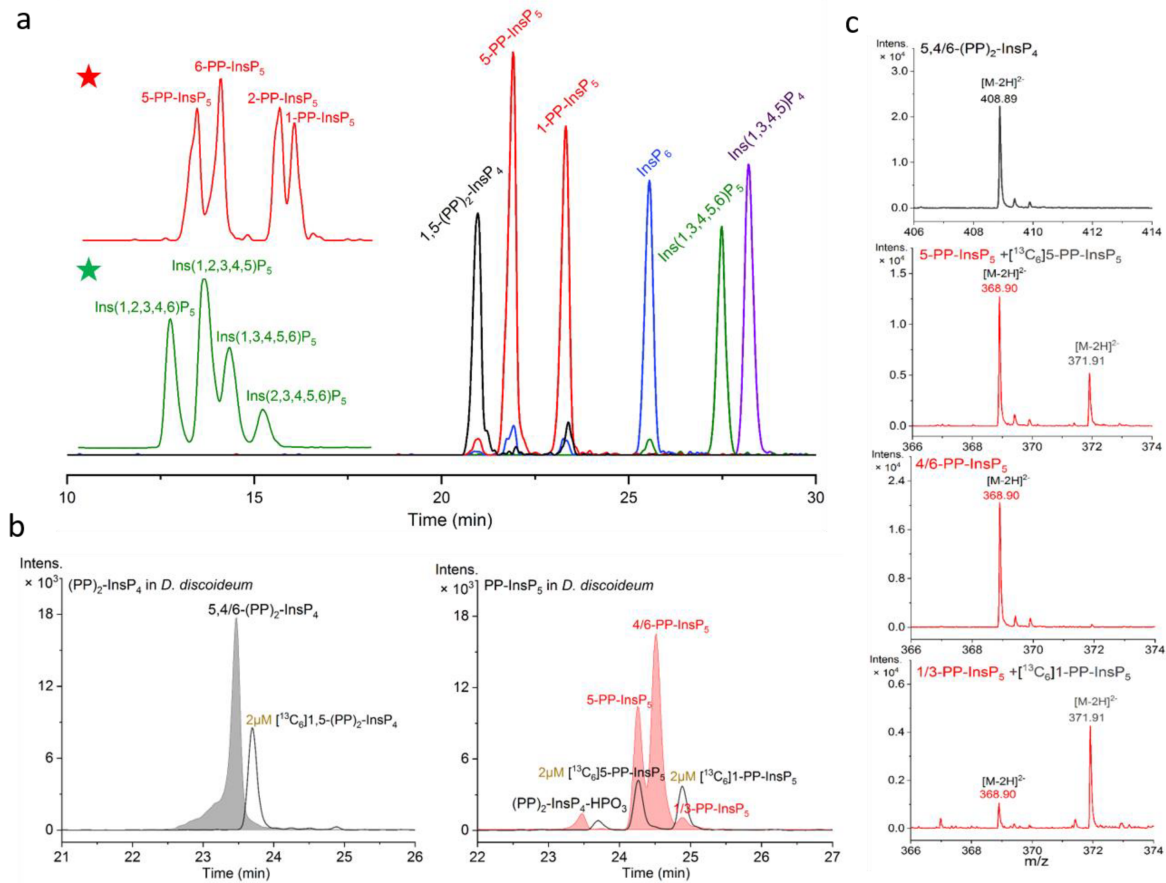

1

2 **Figure 4 CE-ESI-MS analysis of *Dictyostelium discoideum* extract.** (a) Separation of PP-  
3 InsP and InsP standards using a modified BGE (30 mM ammonium acetate titrated with  
4 NH<sub>4</sub>OH to pH 9.0). Enlarged inserts for PP-InsP<sub>5</sub> (★) and InsP<sub>5</sub> (★) reveal the separation of  
5 all regioisomers using the following parameters. CE voltage: 30 kV, CE current: 19 μA,  
6 injection: 50 mbar, 10 s (10 nL), solutes: 10 μM for Ins(1,3,4,5,6)P<sub>5</sub>, InsP<sub>6</sub>, 5-PP-InsP<sub>5</sub>, 1-PP-  
7 InsP<sub>5</sub> and 1,5-(PP)<sub>2</sub>-InsP<sub>4</sub>, 20 μg/mL for Ins(1,3,4,5)P<sub>4</sub>; (b) PP-InsPs in *D. discoideum*  
8 extracts. PP-InsP regioisomers could be efficiently assigned and quantified in single runs with  
9 spiked (isotopic) standards: major 5,4/6-(PP)<sub>2</sub>-InsP<sub>4</sub>, 4/6-PP-InsP<sub>5</sub> and 5-PP-InsP<sub>5</sub>, minor 1/3-  
10 PP-InsP<sub>5</sub>; (c) Mass spectra for PP-InsPs in *D. discoideum* in (b). Three independent *D.*  
11 *discoideum* AX2 (wild type) extracts were analyzed giving identical results.

12

13

14

15

16

17

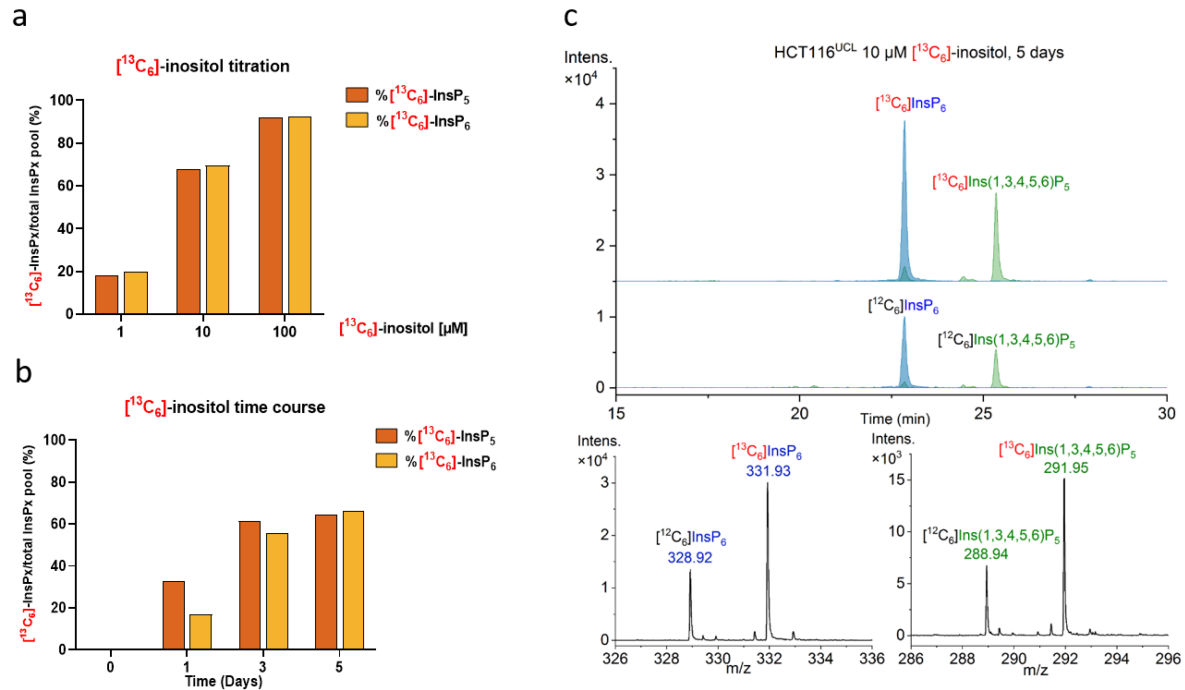

1

2 **Figure 5 CE-ESI-MS analysis after  $[^{13}\text{C}_6]$ -inositol labeling. (a)** Ratio of  $[^{13}\text{C}_6]$ InsP<sub>x</sub> (x= 5 or  
3 6) over total InsP<sub>x</sub> ( $[^{13}\text{C}_6]$ InsP<sub>x</sub> +  $[^{12}\text{C}_6]$ InsP<sub>x</sub>) pool in wild type HCT116<sup>UCL</sup> after 5 days  
4 incubation with different concentrations of  $[^{13}\text{C}_6]$ -inositol (1,10,100  $\mu\text{M}$ ) in inositol-free DMEM;  
5 **(b)** Ratio of  $[^{13}\text{C}_6]$ -InsP<sub>x</sub> in total InsP<sub>x</sub> pool in wild type HCT116<sup>UCL</sup> cells incubated with 10  $\mu\text{M}$   
6  $[^{13}\text{C}_6]$ -inositol in inositol-free DMEM for 1, 3 and 5 days; **(c)** EIEs of InsP<sub>6</sub> and Ins(1,3,4,5,6)P<sub>5</sub>  
7 in HCT116<sup>UCL</sup> cells after 5 days incubation with 10  $\mu\text{M}$   $[^{13}\text{C}_6]$ -inositol and relative mass spectra.

8

9

10

11

12

13

14

15

16

17

18

19



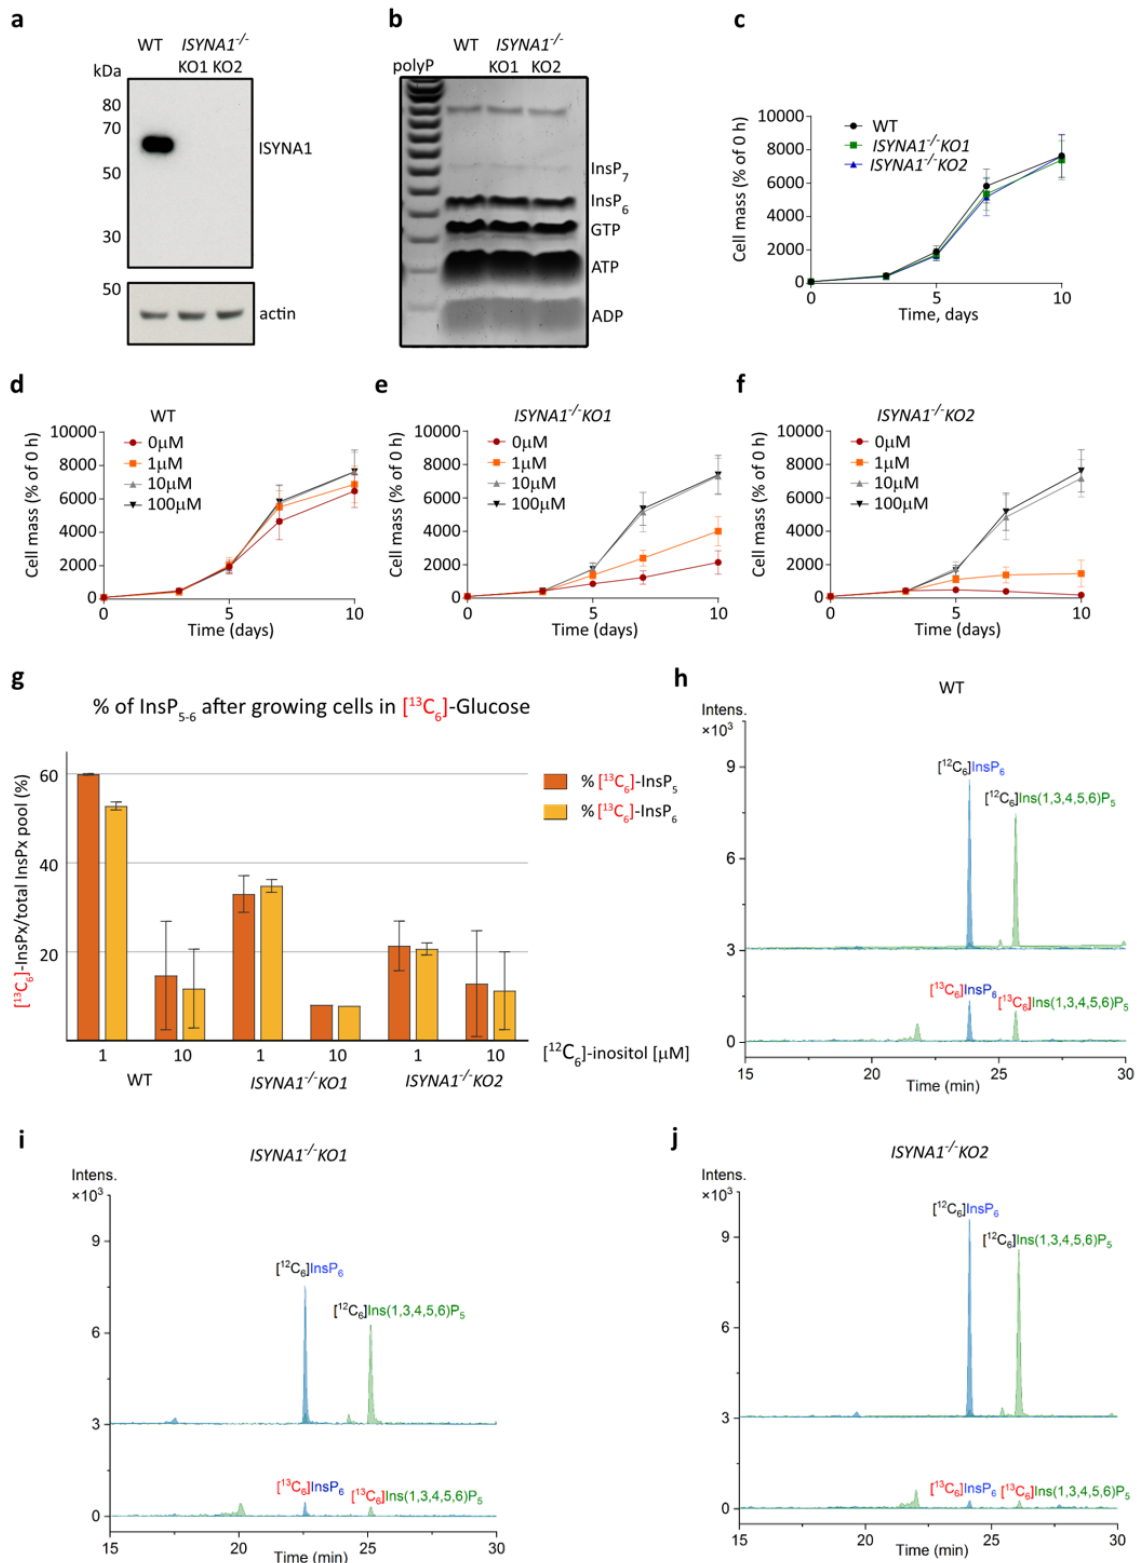

1

2 **Figure 6 Analysis of *ISYNA1*<sup>-/-</sup> cell lines by CE-ESI-MS. (a)** Western blot showing the  
 3 absence of ISYNA1 protein in CRISPR-generated HCT116<sup>UCL</sup> *ISYNA1*<sup>-/-</sup> clones KO1 and KO2.  
 4 These lines possess a normal level of InsP<sub>6</sub> as revealed by PAGE (b) and a normal growth  
 5 rate in standard DMEM (c). Inositol titration growth curves (d, e, f) demonstrated strongly

1 reduced growth for the KO cells in the absence of inositol, while a concentration of 10  $\mu$ M  
2 inositol is sufficient to restore normal growth. **(g)** Ratio of [ $^{13}\text{C}_6$ ]InsP<sub>x</sub> over total InsP<sub>x</sub> pool (x =  
3 5 or 6) in WT, KO1 and KO2 clones grown for 5 days in 25 mM [ $^{13}\text{C}_6$ ]-glucose supplemented  
4 with 1 or 10  $\mu$ M inositol. Data are means  $\pm$  SD from two independent experiments; **(h)** EIEs of  
5 InsP<sub>6</sub> and Ins(1,3,4,5,6)P<sub>5</sub> in HCT116<sup>UCL</sup> cells after 5 days in 25 mM [ $^{13}\text{C}_6$ ]-glucose and 10  $\mu$ M  
6 inositol, strongly supporting a pathway from glucose for the biosynthesis of inositol phosphates  
7 in mammals; **(i)&(j)** EIEs of InsP<sub>6</sub> and Ins(1,3,4,5,6)P<sub>5</sub> in KO1 and KO2 cells after 5 days in  
8 25 mM [ $^{13}\text{C}_6$ ]-glucose with 10  $\mu$ M inositol. Detectable [ $^{13}\text{C}_6$ ]InsP<sub>x</sub> was produced in both clones  
9 although at a lesser degree than in wild type (h).
